# Supplementary material for: A neural basis for antagonistic control of feeding and compulsive behaviors
Source: PubMed Central journal article supplement (PMC5754347; doi:10.1038/s41467-017-02534-9), 2018-01-04
Supplement: 41467_2017_2534_MOESM1_ESM.pdf [file 41467_2017_2534_MOESM1_ESM.pdf]

## *Pdx1-Cre::Ai9*

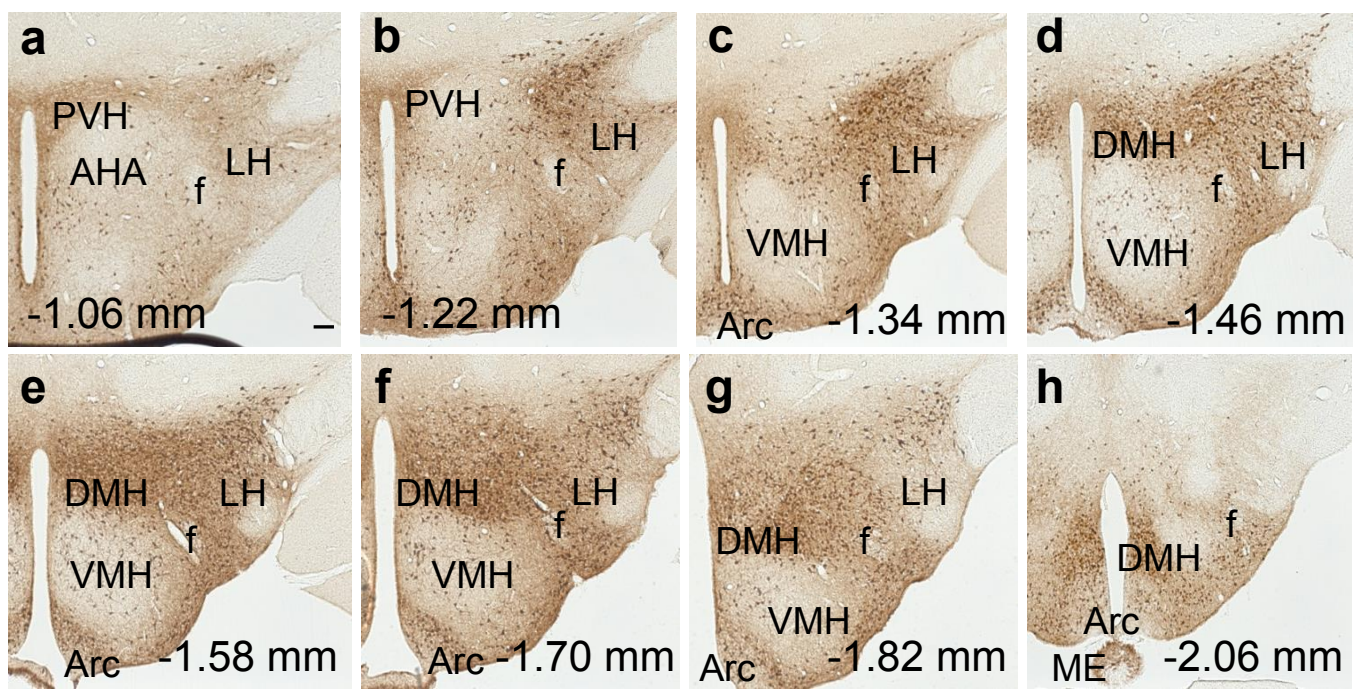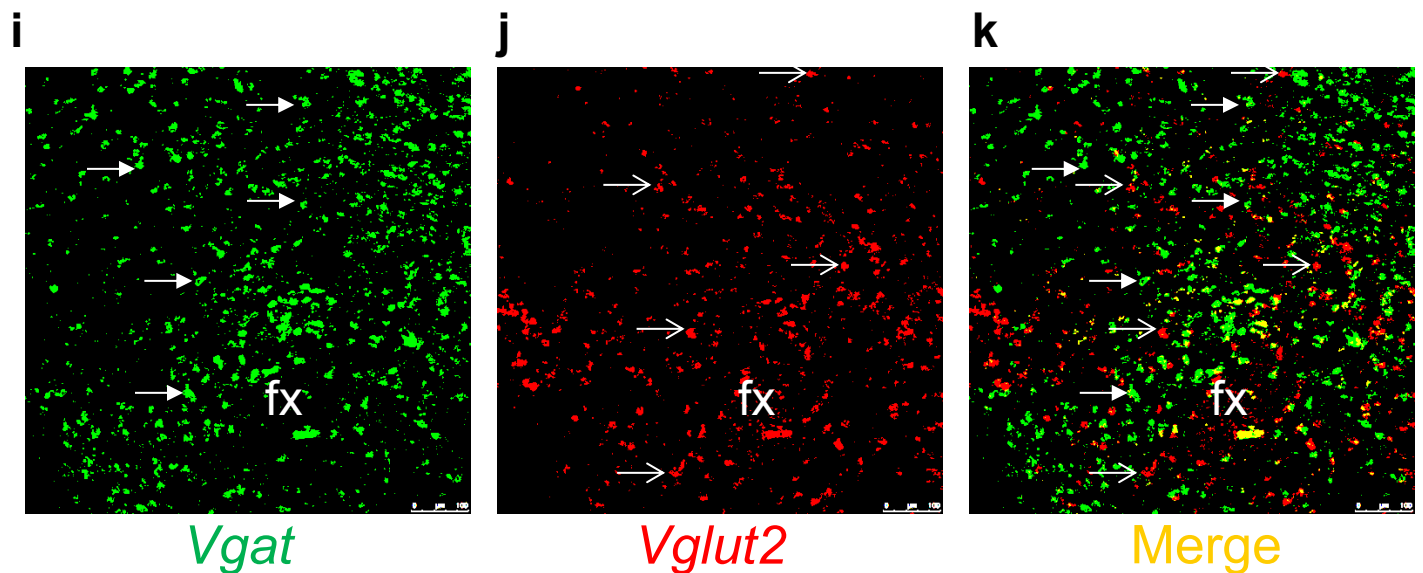

**Supplementary Figure 1** *Pdx1-Cre* expression in hypothalamic brain regions, including LH, which contain segregated GABA and glutamatergic neuron populations. *Pdx1-Cre* mice were bred to Gt(ROSA)26Sortm9(CAG-tdTomato)Hze, also known as Ai9 reporter mice, to allow red-fluorescent protein (RFP) visualization in cre-positive neurons and fibers. In a rostral to caudal fashion, (a-h) show RFP expression in hypothalamic neurons, including those in the LH, and projection fibers located in the PVH. Prominent *Pdx1-Cre* expression in LH is noted in the medial to caudal portions of the LH (-1.22 to -1.82 mm Bregma, b-g), but is not seen in LH area anterior to Bregma -1.22 mm. Other prominent *Pdx1-Cre* positive neurons are seen in the DMH and Arc. Measurements indicate millimeter anterior-posterior distance relative to Bregma. Arc, arcuate nucleus; DMH, dorsomedial hypothalamus; f, fornix; LH, lateral hypothalamus; VMH, ventromedial hypothalamus. (i-k) Double in situ hybridization of *Vgat* (i) and *Vglut2* (j) in the LH area of a wild-type mouse. Merged image (k) shows most *Vgat* and *Vglut2* expressing neurons in LH do not overlap. fx, fornix

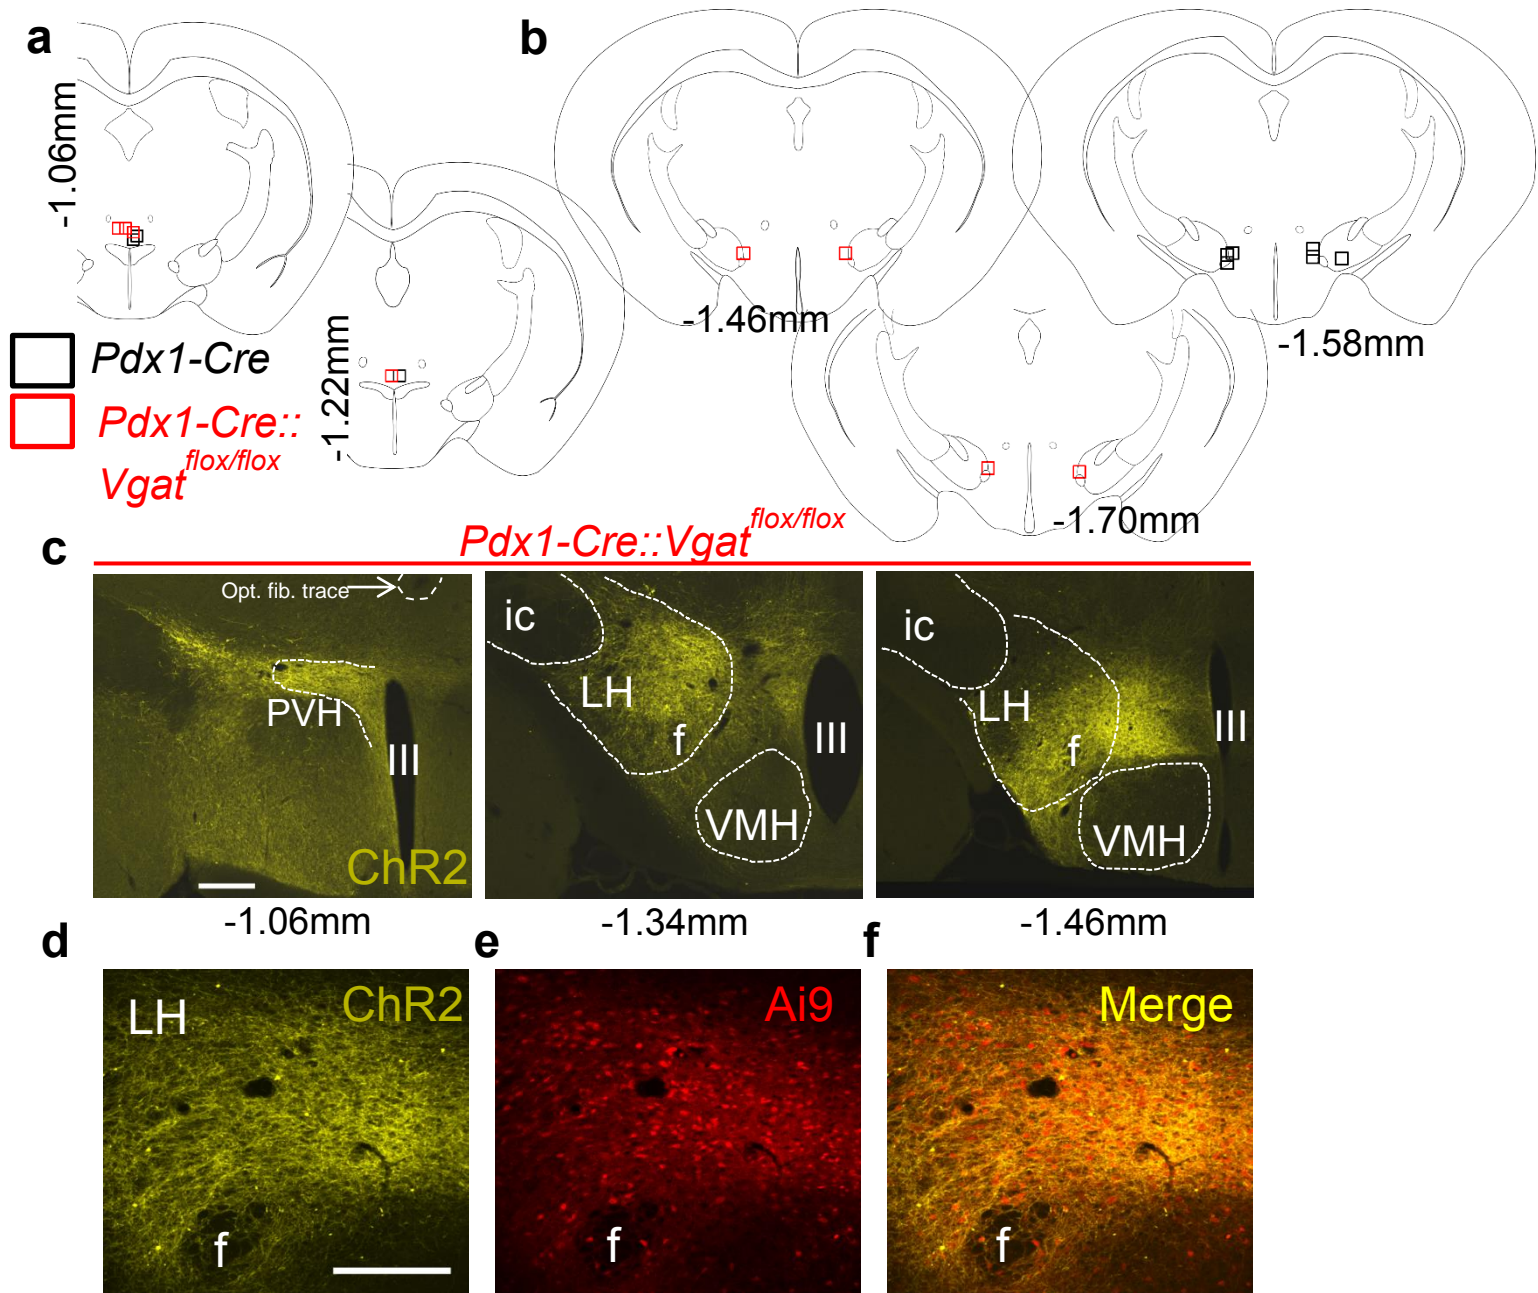

**Supplementary Figure 2** ChR2 expression in LH<sup>Pdx1</sup> neurons. (a) Post-hoc analysis in coronal brain sections revealed optic fiber traces over caudal portions of the PVH in *Pdx1-Cre* mice (black outlined boxes) and *Pdx1-Cre::Vgat<sup>flox/flox</sup>* mice (red outlined boxes) used for experiments in **Figure 2**. (b) Shows approximate ChR2 injection sites, as determined by dense eYFP expression, in the same mice. (c) Representative images taken from brain slices of a *Pdx1-Cre::Vgat<sup>flox/flox</sup>* mouse used in experiments for **Fig. 2** reveal ChR2 expression in PVH projection fibers and optical fiber implantation above PVH (opt. fib. trace, arrow) (left image) and ChR2 expression in LH<sup>Pdx1</sup> neurons (middle and right images). (a-c): millimeter measurements indicate anterior-posterior distance relative to Bregma. III, third ventricle; f, fornix; ic, internal capsule; LH, lateral hypothalamus; PVH, paraventricular hypothalamus; VMH, ventromedial hypothalamus. Scale bar = 300µm. (d-f) Representative coronal brain slice images from a *Pdx1-Cre::Ai9* reporter mouse used in **Fig. 2** experiments show ChR2 (d) and Ai9 (e) expression overlapping in the LH region (f). Scale bar = 250 µm.

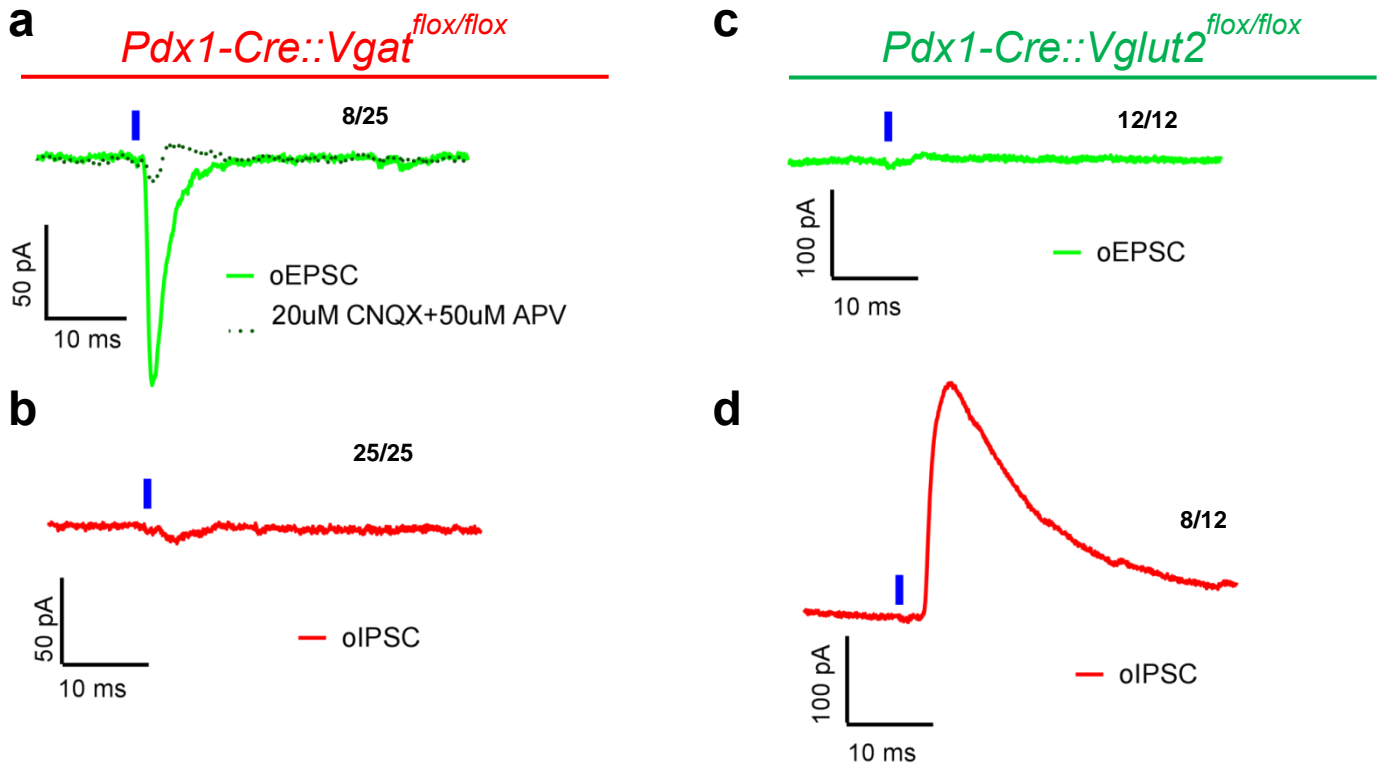

**Supplementary Figure 3** Inhibitory and excitatory post-synaptic currents in PVH elicited by blue light stimulation of LH<sup>*Pdx1-ChR2*</sup> fibers require vesicular GABA transporter (*Vgat*) and vesicular glutamate transporter 2 (*Vglut2*), respectively. (a) Voltage clamp recordings in PVH brain slices of *Pdx1-Cre::Vgat<sup>flox/flox</sup>* mice reveal optically-evoked excitatory post-synaptic currents (oEPSCs, which can be blocked by ionotropic glutamate receptor blockers CNQX+APV), but not optically-evoked inhibitory post-synaptic currents (oIPSCs) (b). Conversely, PVH recordings in *Pdx1-Cre::Vglut2<sup>flox/flox</sup>* brain slices show light can elicit IPSCs (d) but not EPSCs (c). Blue ticks indicate 1-ms blue light pulse.

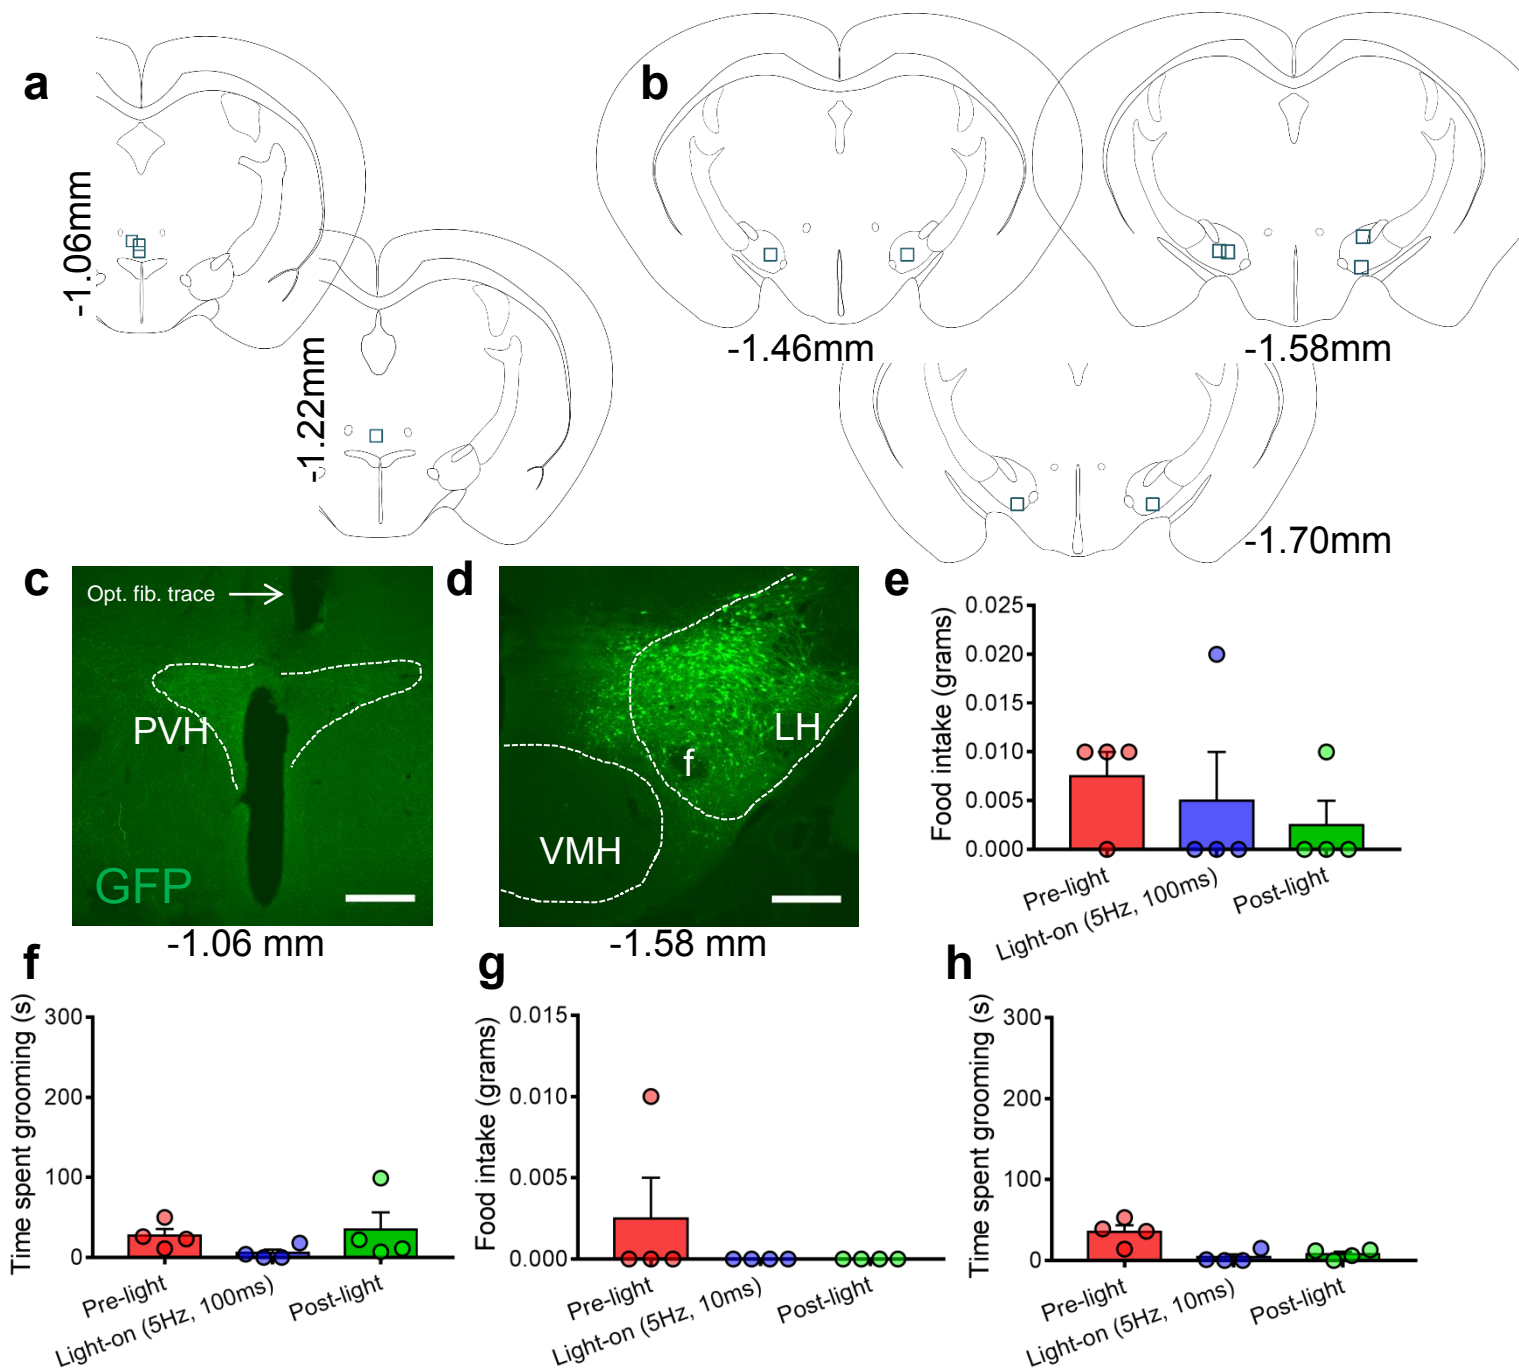

**Supplementary Figure 4** Photostimulation of LH<sup>Pdx1-GFP</sup> expressing fibers in PVH does not increase feeding or grooming behaviors. (a) Post-hoc analysis of brain slices show optic fiber placements (blue outlined boxes) above caudal PVH regions in *Pdx1-Cre* mice injected with cre-dependent GFP virus in LH. (b) Shows approximate injection locations of GFP (blue outlined boxes) in the same mice. Representative images from a *Pdx1-Cre::GFP* mice (n=4) showing GFP-expressing fibers in PVH and optical fiber implantation above PVH (opt. fib. trace, arrow) (c) and injection site in LH (d). Scale bar = 300 $\mu$ m. *In vivo* photostimulation of LH<sup>Pdx1-GFP</sup>→PVH fibers does not cause significant increases in either feeding (e, g) or grooming behaviors (f, h), irrespective of light stimulation protocol (5Hz, 10 vs. 100 ms). Repeated measures ANOVA: (e) Light epoch F (2, 6) = 0.4286, P=0.6699; (f) Light epoch F (2, 6) = 1.644, P=0.2696; (g) Light epoch F (2, 6) = 1, P=0.4219 (h) Light epoch F (2, 6) = 7.057, P=0.0265). Data presented as  $\pm$ s.e.m.

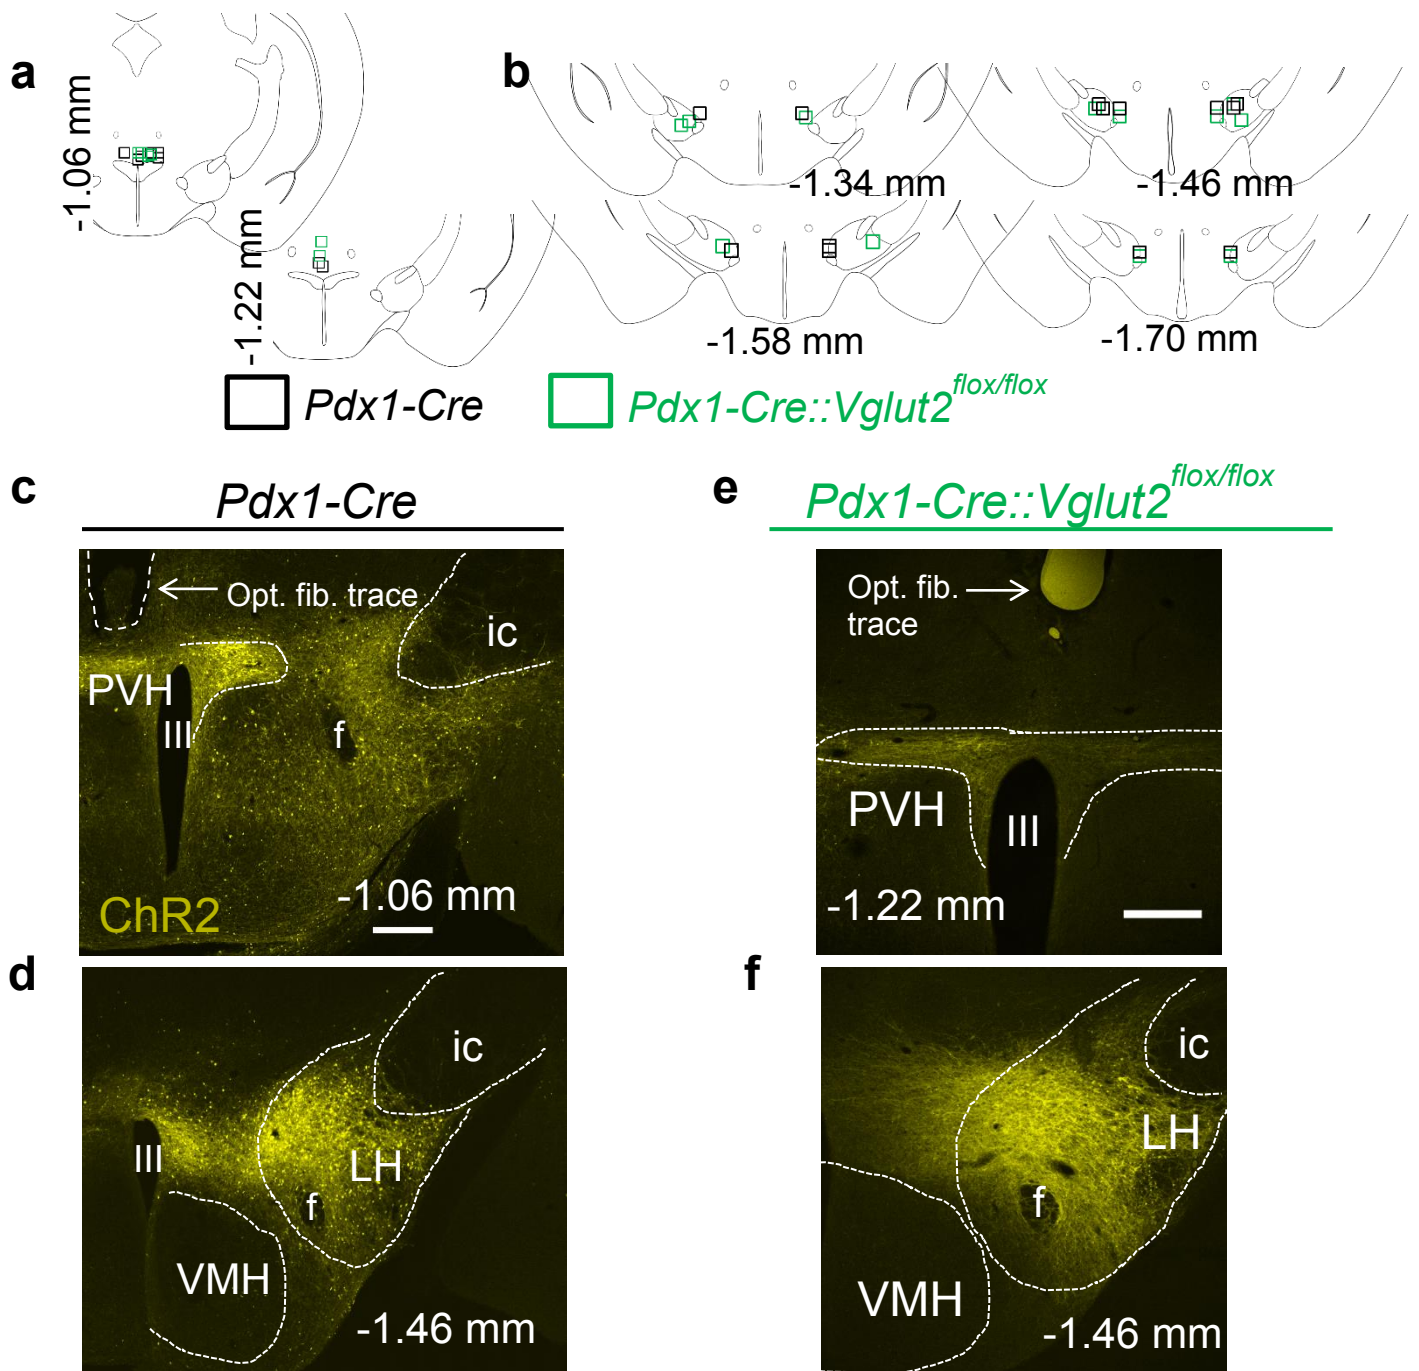

**Supplementary Figure 5** ChR2 expression in LH neurons and PVH projection fibers in *Pdx1-Cre* and *Pdx1-Cre::Vglut2<sup>flox/flox</sup>* mice. (a) Post-hoc analysis in brains of mice used for **Figure 3** experiments shows optic fiber placements above caudal PVH region (indicated by black and green outlined boxes). (b) The same mice received ChR2 injections consistently targeted in the LH region (black and green outlined boxes). Representative PVH brain slice image of a *Pdx1-Cre* mouse showing ChR2-expressing fibers in rostral PVH and optical fiber implantation above PVH (opt. fib. trace, arrow) (c) and ChR2 injection site in LH (d). Representative brain slice images from a *Pdx1-Cre::Vglut2<sup>flox/flox</sup>* mouse reveals ChR2 fibers in caudal PVH and optical fiber implantation above PVH (left image) (e) and ChR2 injection site in LH (f). Scale bar = 300 $\mu$ m. III, third ventricle; f, fornix; ic, internal capsule; LH, lateral hypothalamus; PVH, paraventricular hypothalamus; VMH, ventromedial hypothalamus.

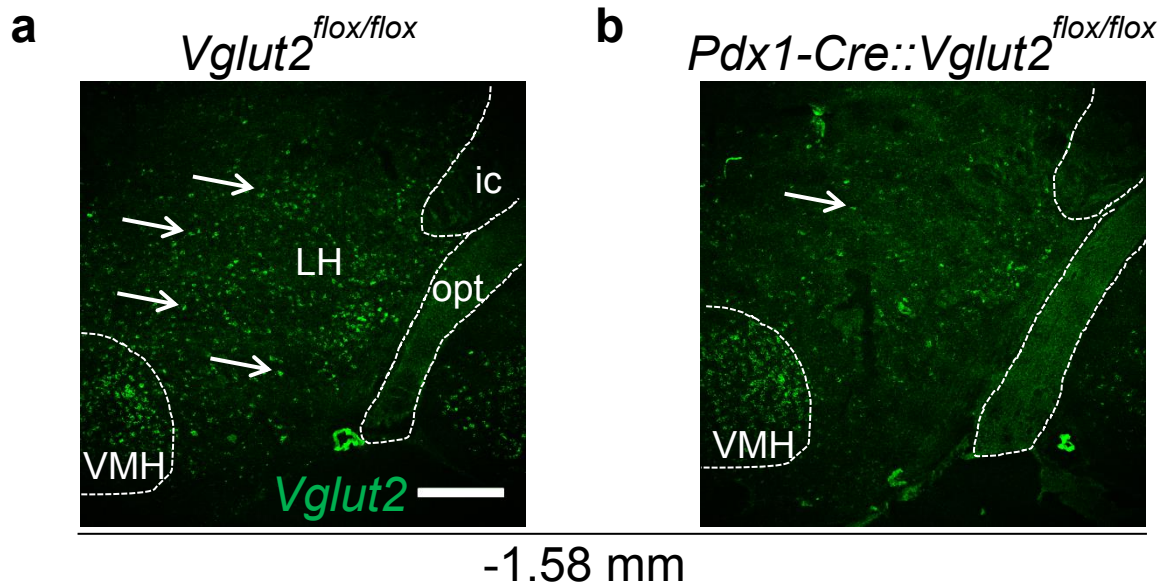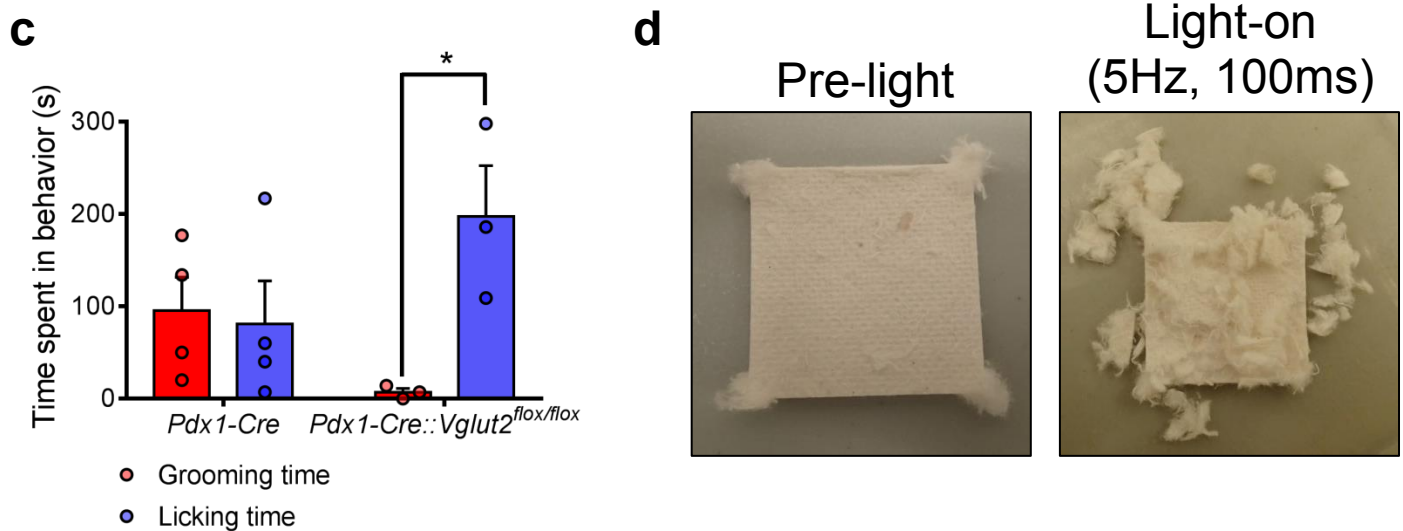

**Supplementary Figure 6** Photostimulation of GABAergic LH→PVH projections causes chewing and licking behavior. (a-b) *In situ* hybridization for *Vglut2* mRNA in fresh frozen coronal brain slices shows numerous neurons with *in situ* fluorescent signal (arrows) in the LH region of *Vglut2<sup>flox/flox</sup>* mice (a). In contrast, in *Pdx1-Cre::Vglut2<sup>flox/flox</sup>* mice, the number of neurons with *in situ* fluorescent signal in a matching LH-containing section is dramatically reduced while it is not changed in neighboring VMH area (b). Scale bar = 300µm. Millimeter measurement indicates anterior-posterior distance from Bregma. ic, internal capsule; LH, lateral hypothalamus; opt, optic tract; VMH, ventromedial hypothalamus. (c) When mice were placed in a bare cage (no food or bedding), *Pdx1-Cre* mice spent approximately equal amounts of time grooming and aimlessly licking the floors and sides of the cage upon LH<sup>*Pdx1-ChR2*</sup>→PVH photostimulation (5Hz, 100ms); however, *Pdx1-Cre::Vglut2<sup>flox/flox</sup>* spent significantly more time licking the cage than grooming upon the same light stimulation (two-way ANOVA; Interaction F (1, 10) = 5.984, P=0.0345; Sidak's multiple comparisons test: Grooming time vs. Licking time (*Pdx1-Cre::Vglut2<sup>flox/flox</sup>*) \*p<0.05). Data presented as ± s.e.m. (d) A portion of the *Pdx1-Cre* and *Pdx1-Cre::Vglut2<sup>flox/flox</sup>* mice violently chewed on a square piece of bedding upon light stimulation of LH<sup>*Pdx1-ChR2*</sup>→PVH circuit when food was absent. Pictures are of the same piece of bedding following 5 minutes pre-light and 5 minutes light-on stimulation.

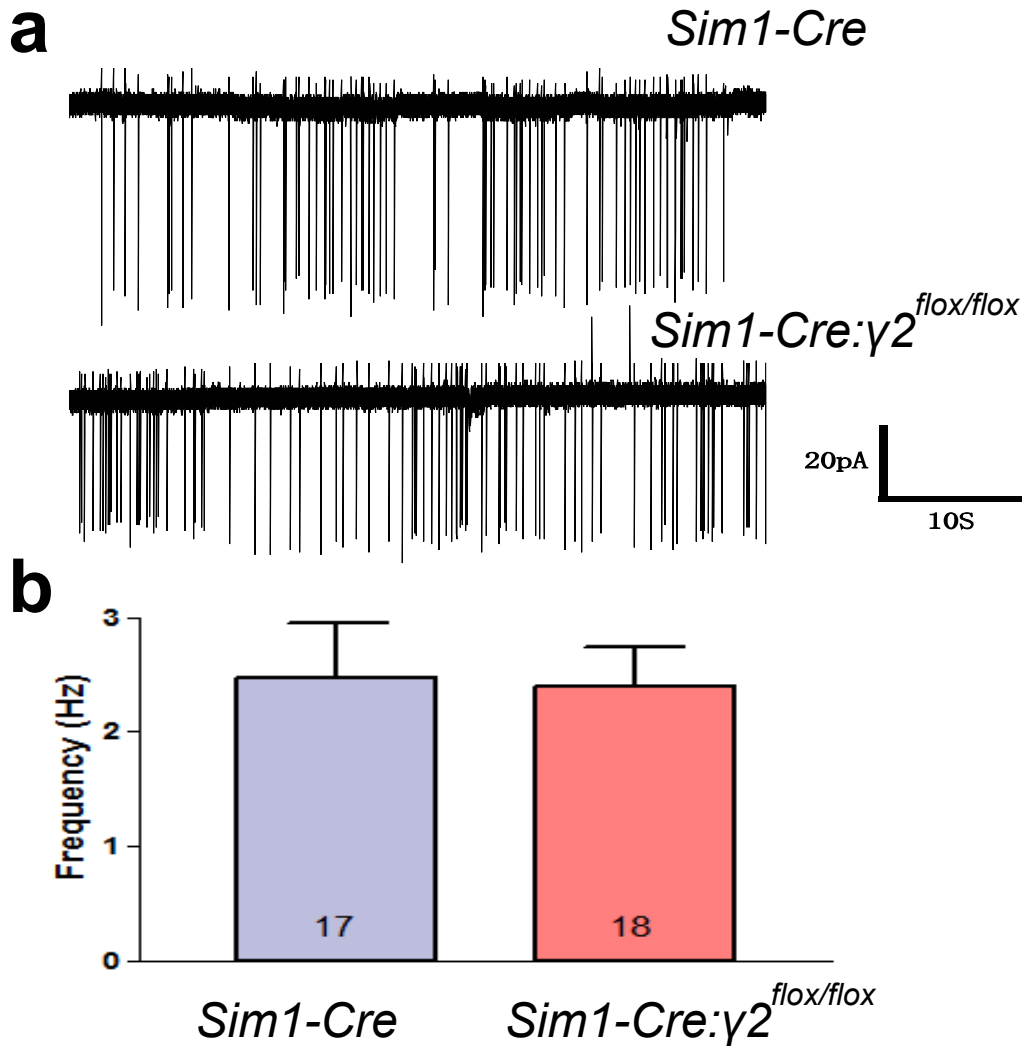

**Supplementary Figure 7** Deletion of  $\gamma 2$  in *Sim1* neurons does not affect spontaneous firing activity in  $PVH^{Sim1}$  neurons. **(a)** Loose-patch recordings (voltage-clamp mode) of spontaneous spike discharge in  $PVH^{Sim1}$  neurons of *Sim1-Cre* (top) and *Sim1-Cre::γ2<sup>flox/flox</sup>* (bottom) mice. **(b)** Quantification of firing frequency in  $PVH^{Sim1}$  neurons between the indicated two groups of mice does not reveal changes in overall neuron activity between genotypes.

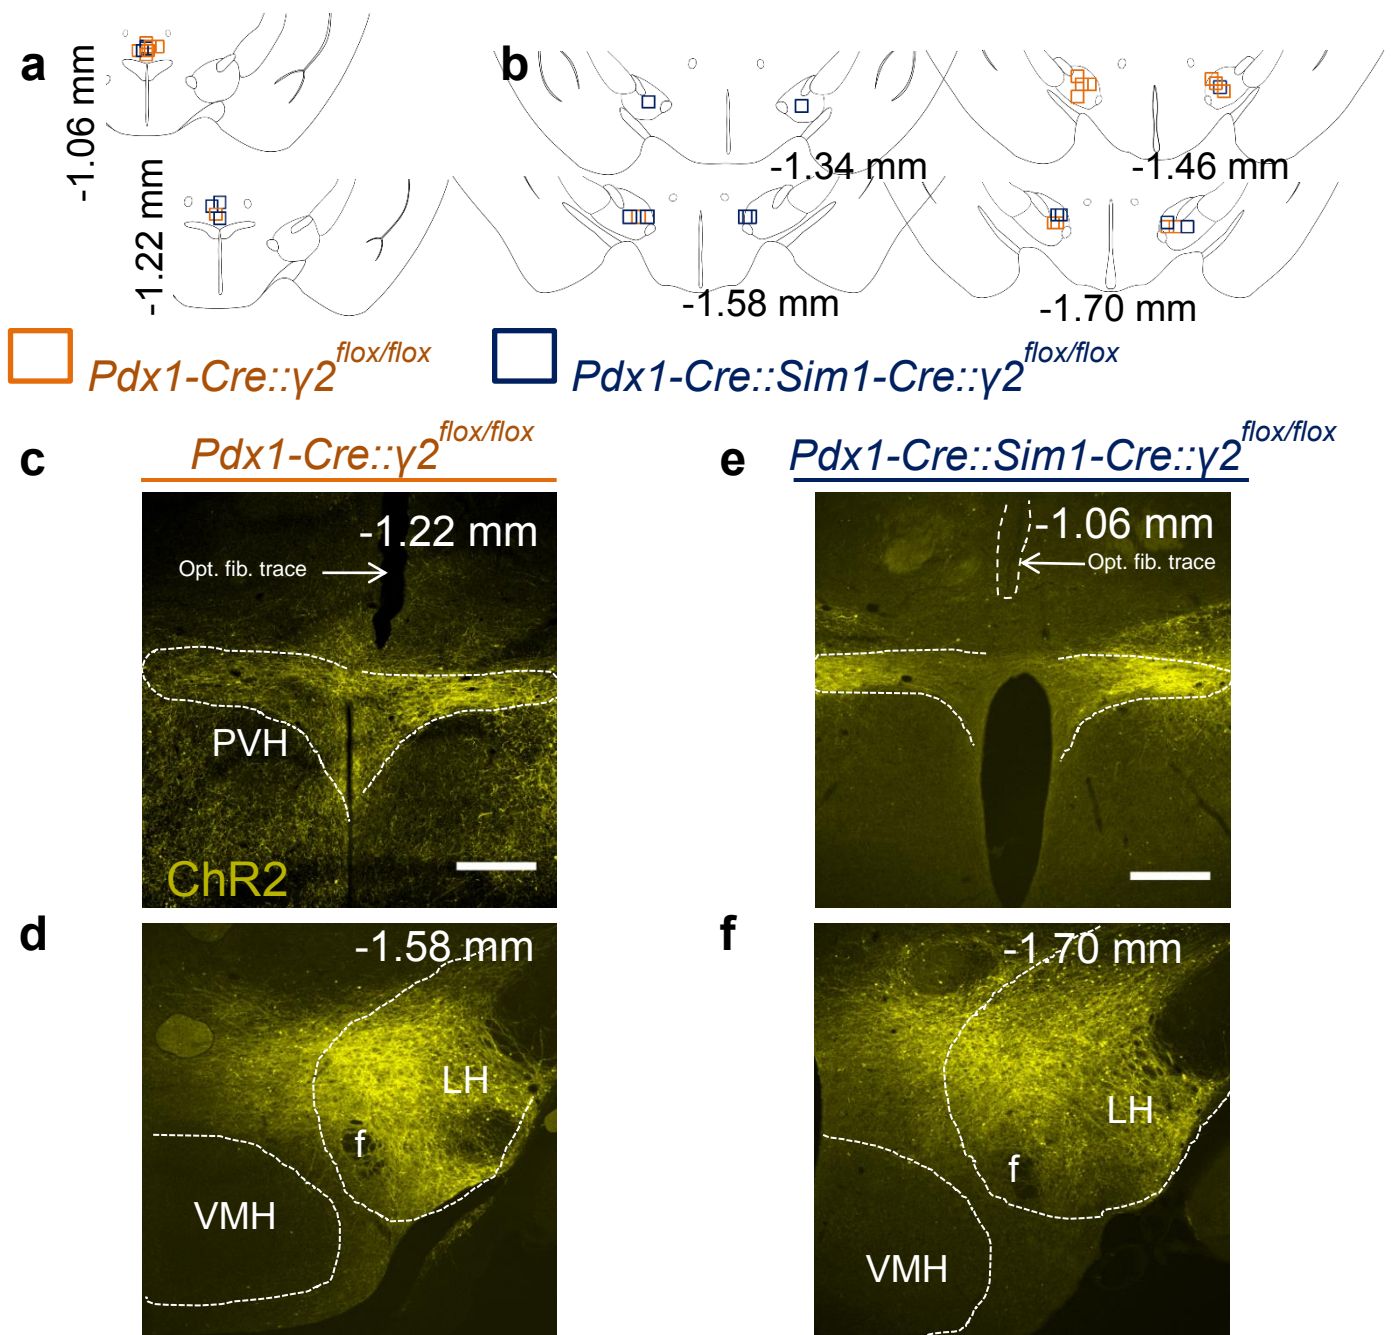

**Supplementary Figure 8** ChR2 expression in LH neurons and PVH projection fibers in *Pdx1-Cre:: $\gamma 2^{flox/flox}$*  and *Pdx1-Cre::Sim1-Cre:: $\gamma 2^{flox/flox}$*  mice. **(a-b)** Post-hoc analysis in brains of mice used for **Figure 4d** experiments confirmed optic fiber placements above caudal PVH region **(a)** (orange and blue outlined boxes) and successful targeting of ChR2 to the LH region **(b)** (orange and blue outlined boxes). Representative coronal brain slice images from a *Pdx1-Cre:: $\gamma 2^{flox/flox}$*  mouse showing ChR2 expression in caudal PVH fibers and optical fiber implantation above PVH (opt. fib. trace) **(c)** and ChR2 expression in LH injection site **(d)**. Representative coronal brain slice images from a *Pdx1-Cre::Sim1-Cre:: $\gamma 2^{flox/flox}$*  mouse showing ChR2-expressing fibers in caudal PVH and optical fiber implantation above PVH (opt. fib. trace, arrow) **(e)** and ChR2 expression in LH injection site **(f)**. Millimeter measurements indicate anterior-posterior distance relative to Bregma. LH, lateral hypothalamus; VMH, ventromedial hypothalamus.



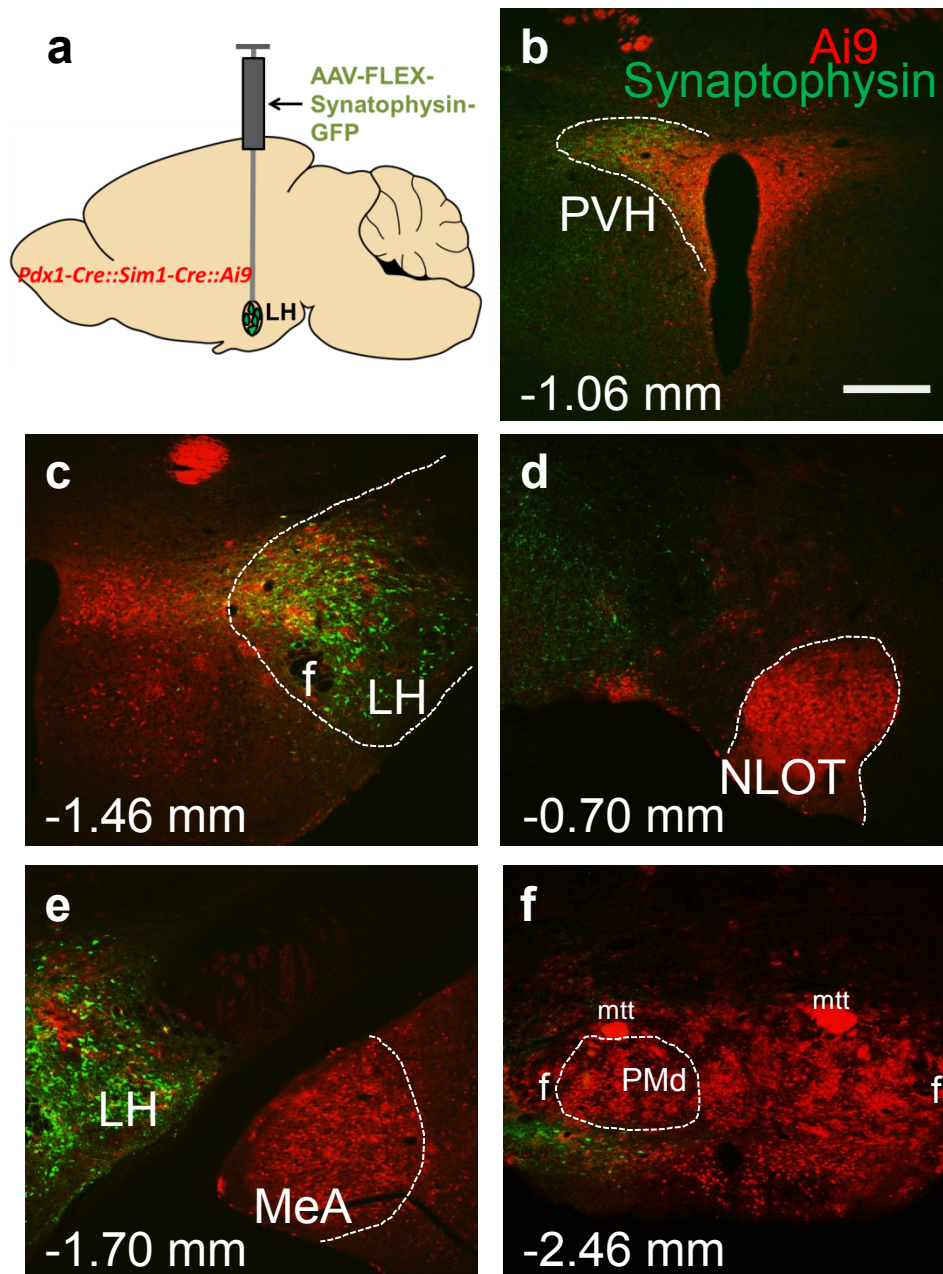

**Supplementary Figure 9** LH<sup>*Pdx1*</sup> neurons project to PVH<sup>*Sim1*</sup> but not to other prominent *Sim1*-positive brain regions. (a) Schematic illustrates cre-dependent delivery of synaptophysin-GFP to LH neurons (unilateral injection) in a *Pdx1-Cre::Sim1-Cre::Ai9* mouse for anterograde tracing studies. (b) As expected, prominent synaptophysin-GFP contacts were made with Ai9 neurons in the PVH, suggesting LH<sup>*Pdx1*</sup>→PVH<sup>*Sim1*</sup> synaptic connections. (c) Shows successful viral delivery of synaptophysin-GFP to the LH region. (d-f) Prominent *Sim1*-positive sites include NLOT (d), MeA (e), and preammillary nucleus (f), all of which show little to no GFP overlap in the respective regions. Millimeter measurements indicate anterior-posterior distance relative to Bregma. f, fornix; LH, lateral hypothalamus; MeA, Medial Amygdala nucleus; mammillary nucleus; mtt, mammillothalamic tract; NLOT, nucleus of the lateral olfactory tract; PMd, dorsal preammillary nucleus. Scale bar = 300 μm.

*Pdx1-Cre::Vglut2<sup>flox/flox</sup>::eArchT3.0*

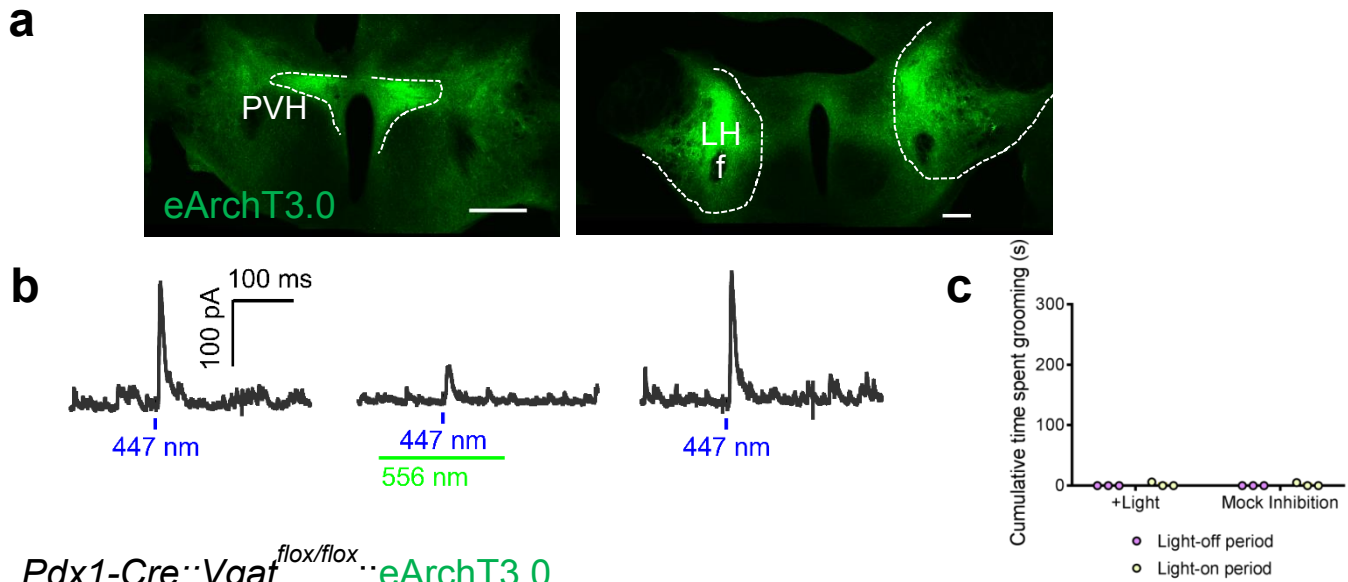

*Pdx1-Cre::Vgat<sup>flox/flox</sup>::eArchT3.0*

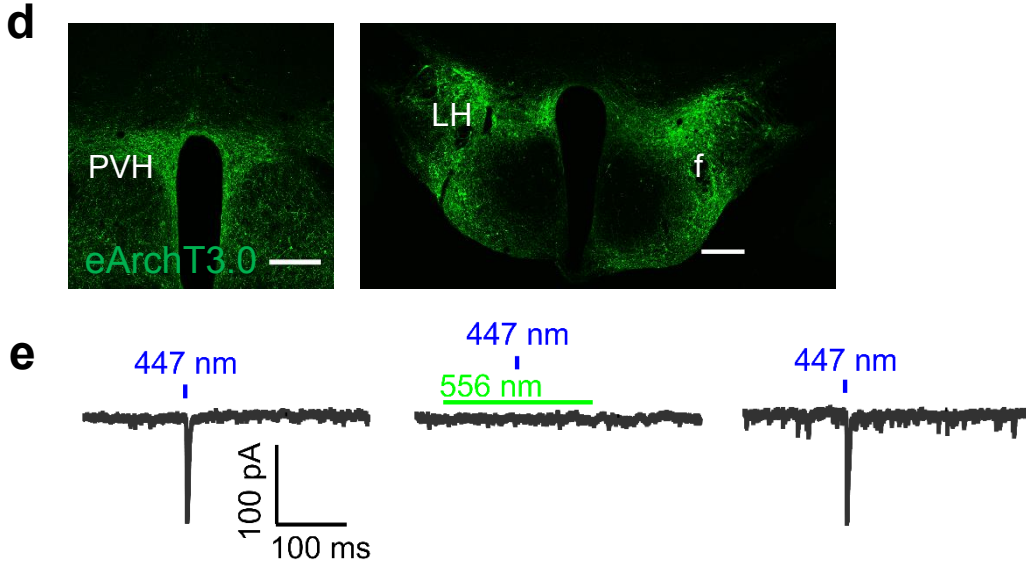

**Supplementary Figure 10** eArchT3.0-mediated inhibition of GABA and glutamate release in LH<sup>*Pdx1*</sup>→PVH terminals. (a) Representative images from a *Pdx1-Cre::Vglut2<sup>flox/flox</sup>::eArchT3.0* mouse (used in **Figure 5** for behavioral experiments) showing eArchT3.0-GFP projection fibers from LH to PVH (left image) and injection sites in LH (right). f, fornix; LH; lateral hypothalamus; PVH, paraventricular nucleus of the hypothalamus. Scale bar = 500 μm. (b) Voltage clamp recordings in PVH brain slices of *Pdx1-Cre* mice receiving LH injections of 50:50 cre-dependent ChR2+eArchT3.0 viruses. Photostimulation-evoked IPSC with a single 2 ms pulse of blue light (left) was reversibly inhibited by illumination with 556nm light (middle, right). Traces shown were averaged responses of 5-6 sweeps. (c) Light (556nm) or mock inhibition of GABAergic LH<sup>*Pdx1*</sup>→PVH terminals in *Pdx1-Cre::Vglut2<sup>flox/flox</sup>::eArchT3.0* mice does not significantly impact grooming time during light-off vs. light-on periods. (d) Representative images from a *Pdx1-Cre::Vgat<sup>flox/flox</sup>::eArchT3.0* mouse (used in **Figure 5** for behavioral experiments) showing eArchT3.0-GFP projection fibers from LH to PVH (left image) and injection sites in LH (right). Scale bar = 300 μm. (e) Voltage clamp recordings in PVH brain slices of *Pdx1-Cre* mice receiving LH injections of 50:50 cre-dependent ChR2+eArchT3.0 viruses. Photostimulation-evoked EPSC with a single 1 ms pulse of blue light (left) was reversibly inhibited by illumination with 556nm light (middle, right). Traces shown were averaged responses of 5-6 sweeps.

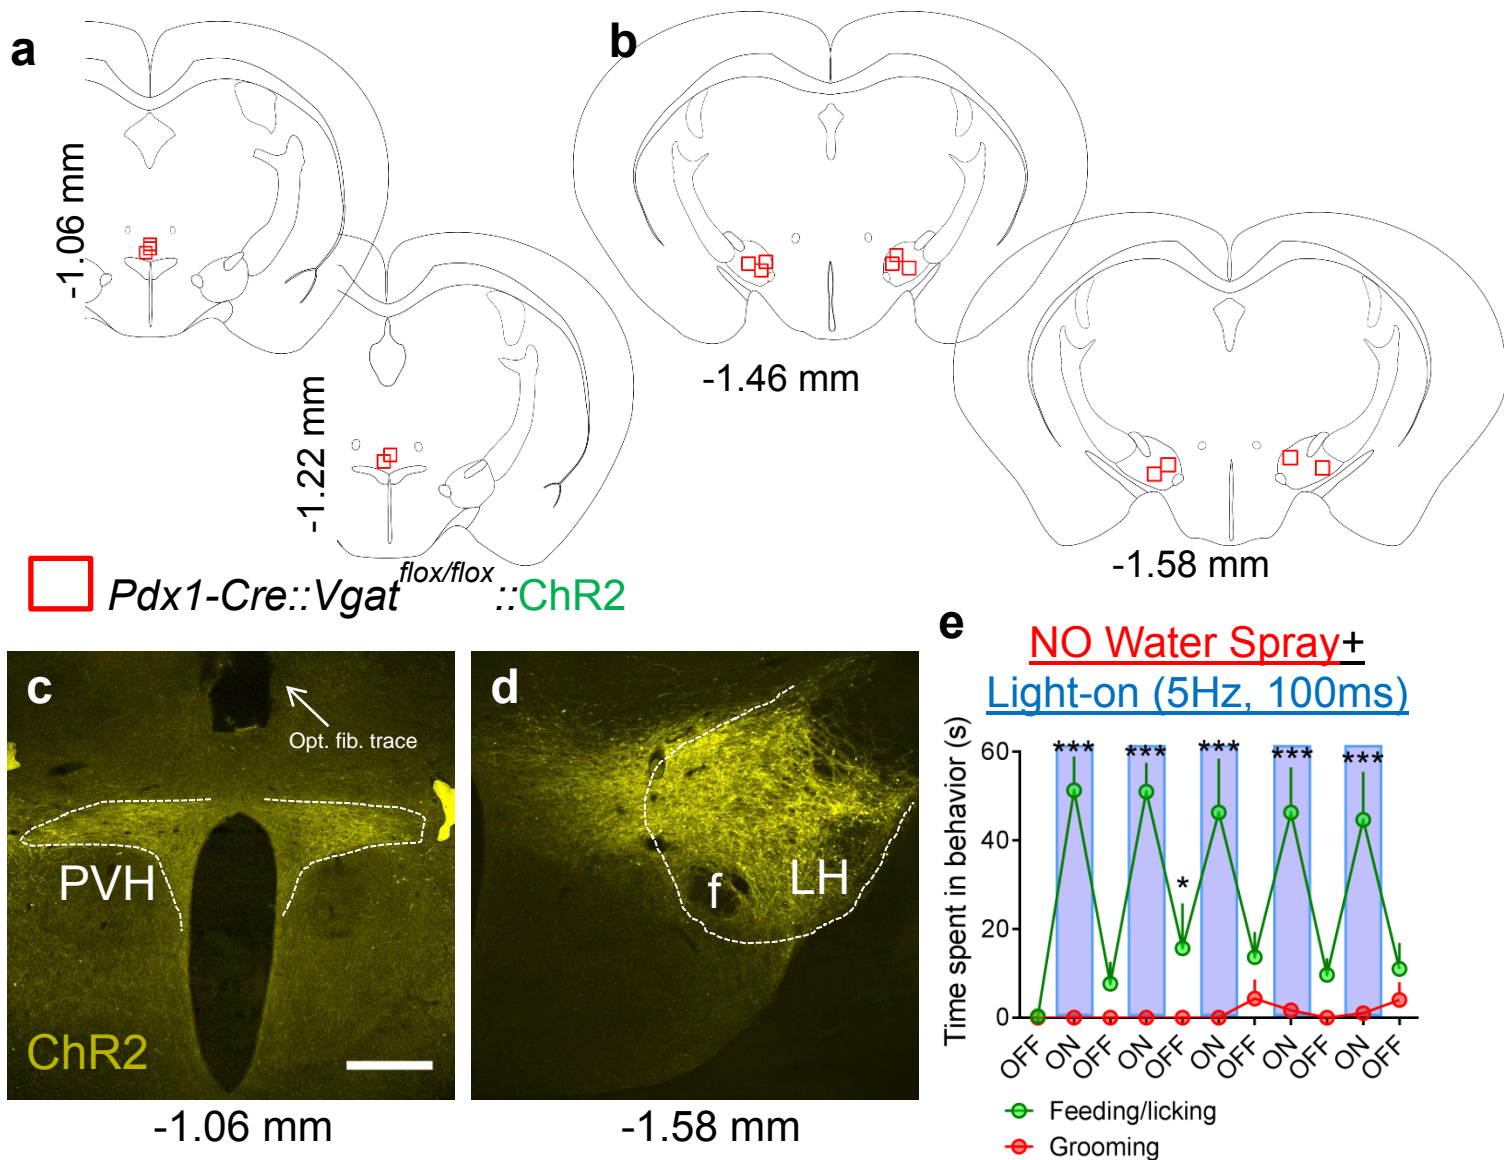

**Supplementary Figure 11** ChR2 expression in LH neurons and PVH projection fibers in *Pdx1-Cre::Vgat<sup>flox/flox</sup>* used in fast-refeeding competition experiments, and photostimulation of LH→PVH GABAergic terminals strongly promotes feeding. (**a-d**) Post-hoc analysis of optic fiber placements and LH injection sites for *Pdx1-Cre::Vgat<sup>flox/flox</sup>::ChR2* mice used for competition experiment in **Figure 6a-c**. Verification of optic fiber placements above PVH (**a**) and successful targeting of ChR2 to LH (**b**). Representative images show ChR2 expression in fibers projecting to PVH and optic fiber trace above PVH (**c**) and approximate injection site of ChR2 to LH region (**d**). f, fornix; LH, lateral hypothalamus; PVH, paraventricular hypothalamus. Scale bar = 300  $\mu$ m. (**e**) *Pdx1-Cre::Vglut2<sup>flox/flox</sup>::ChR2* mice (related to **Figure 6d-f**) consistently spend most of a one-minute block feeding when laser is turned on (473nm; 5Hz, 100ms), while showing little to no increase in grooming behavior regardless of light epoch. Each Off-On epoch lasted one minute each for eleven consecutive minutes. Two-way RM ANOVA; Interaction F (10, 40) = 15.4,  $P < 0.0001$ ; Dunnett's multiple comparisons test: Feeding/licking (first light off vs. On-1, On-2, On-3, On-4, On-5) \*\*\* $p < 0.0005$ ; Feeding/licking (first light off vs. Off-3) \* $p < 0.05$ . Data presented as  $\pm$ s.e.m.

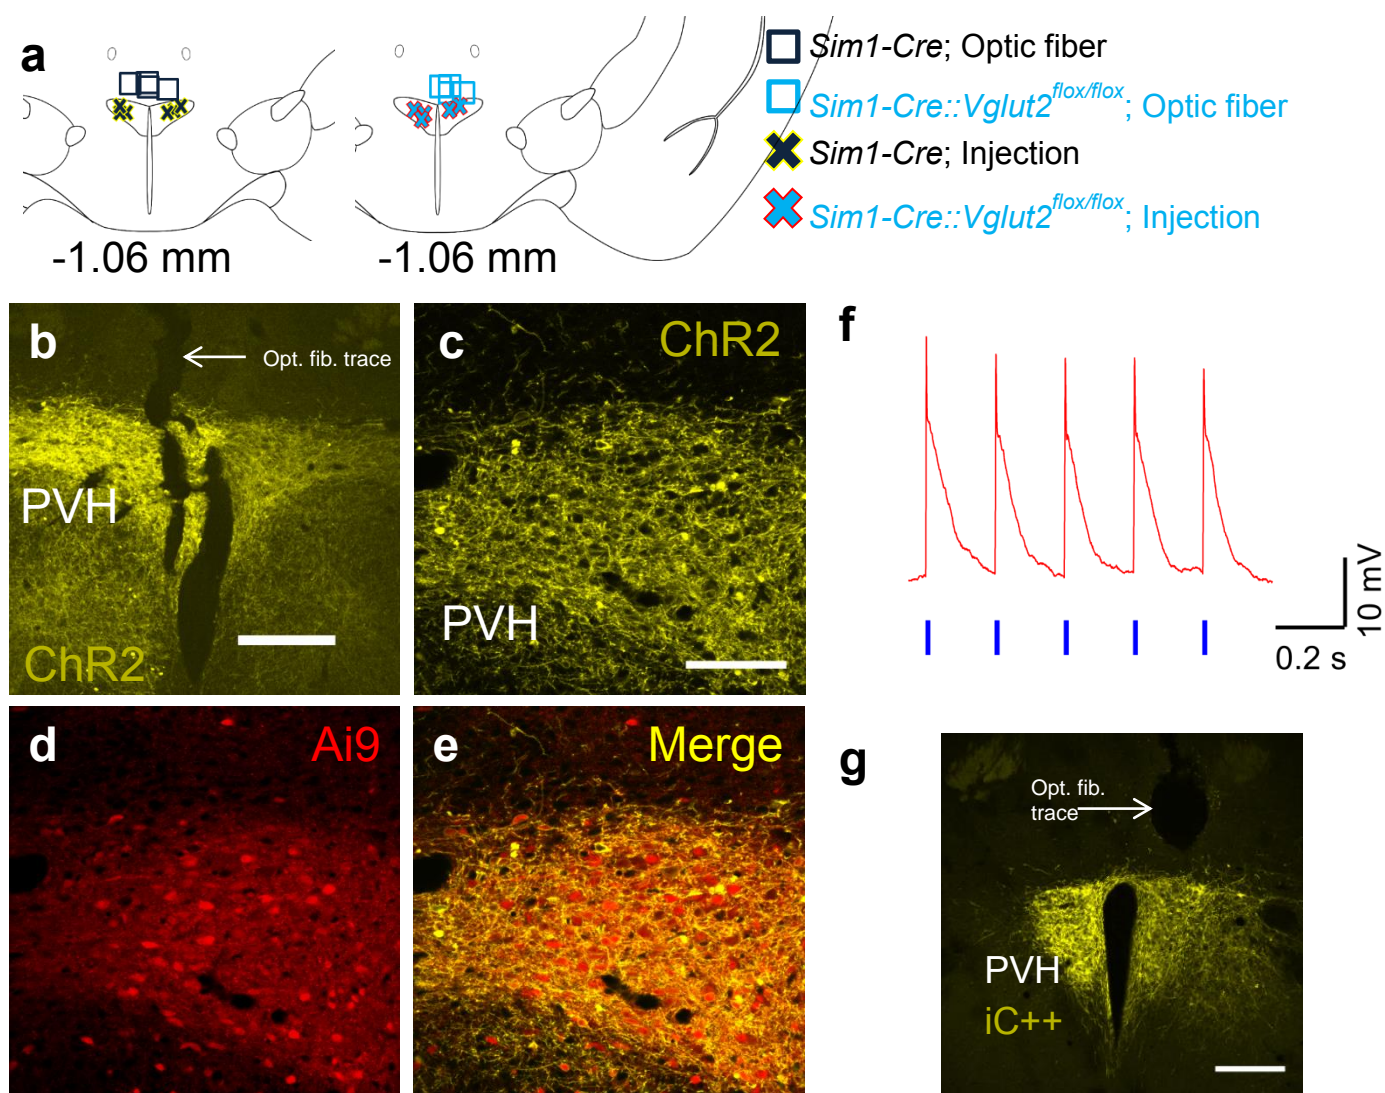

**Supplementary Figure 12** ChR2 or iC++ expression in PVH<sup>*Sim1*</sup> neurons of *Sim1-Cre* and *Sim1-Cre::Vglut2<sup>flox/flox</sup>* mice. **(a)** Post-hoc analysis in brains of mice used in **Figure 7b-e** shows approximate injection locations of ChR2 in PVH and optical fiber implantation above PVH. Dark blue box and light blue box indicate optical fiber placements in *Sim1-Cre* and *Sim1-Cre::Vglut2<sup>flox/flox</sup>* mice, respectively; dark blue X and light blue X indicate approximate ChR2 injection sites in *Sim1-Cre* and *Sim1-Cre::Vglut2<sup>flox/flox</sup>* mice, respectively. **(b)** Representative image from a *Sim1-Cre::Vglut2<sup>flox/flox</sup>* mouse showing ChR2 expression in caudal PVH and optical fiber placement above the same region. Scale bar = 300  $\mu$ m. **(c-e)** Representative image from a *Sim1-Cre::Ai9* reporter mouse with ChR2 expression in PVH region. Close-up of PVH showing ChR2-eYFP fluorescence **(c)** and Ai9-RFP fluorescence **(d)**. Merged image **(e)** shows ChR2 expression encircles the membranes of Ai9-positive cells. Scale bar = 100  $\mu$ m. **(f)** Whole-cell current clamp traces in ChR2-positive PVH<sup>*Sim1*</sup> cells in response to 5 Hz, 10ms blue light pulses (blue ticks = 10ms light pulse). **(g)** iC++-EYFP expression in PVH<sup>*Sim1*</sup> neurons and optical fiber implantation above PVH. Scale bar = 300  $\mu$ m.

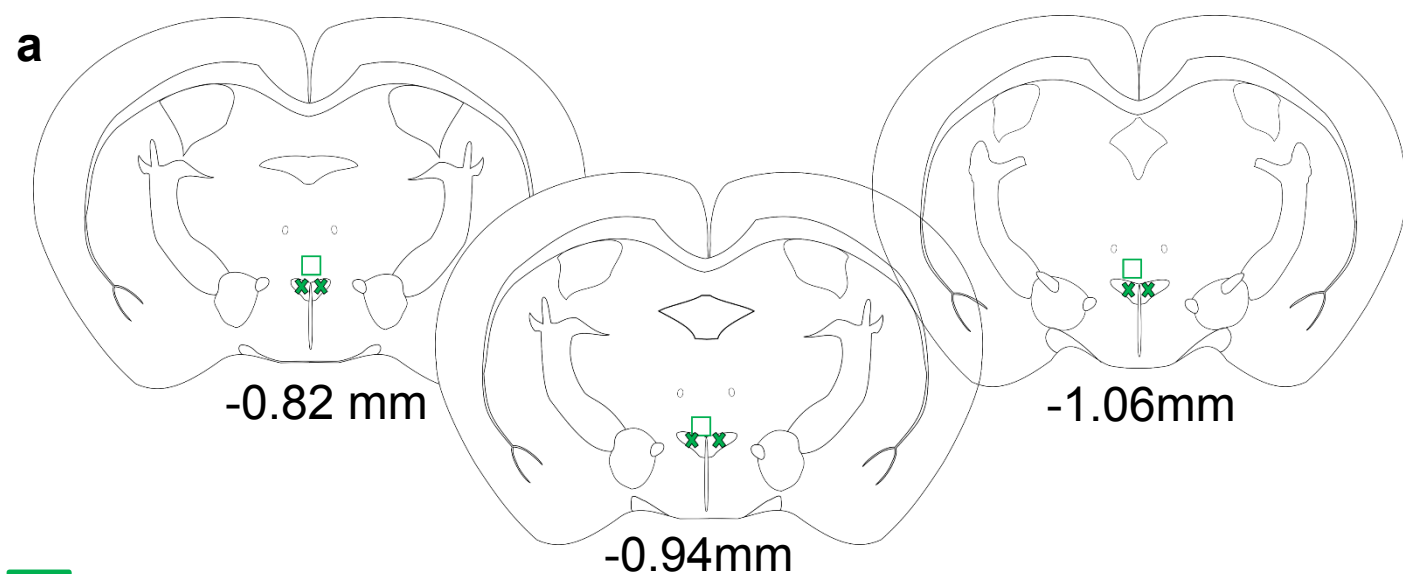

□ *Sim1-Cre::GFP*; Optic fiber

✕ *Sim1-Cre::GFP*; Injection

**b**

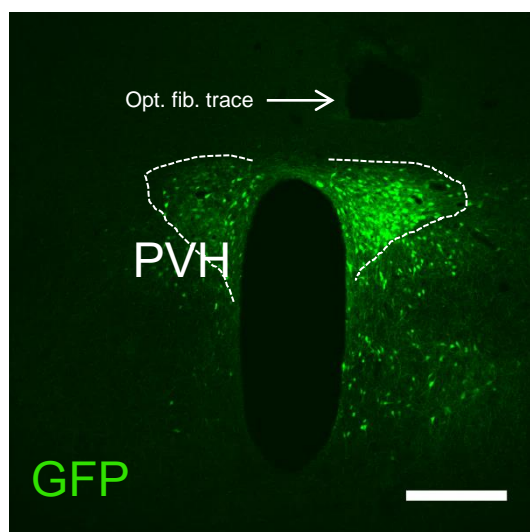

**c**

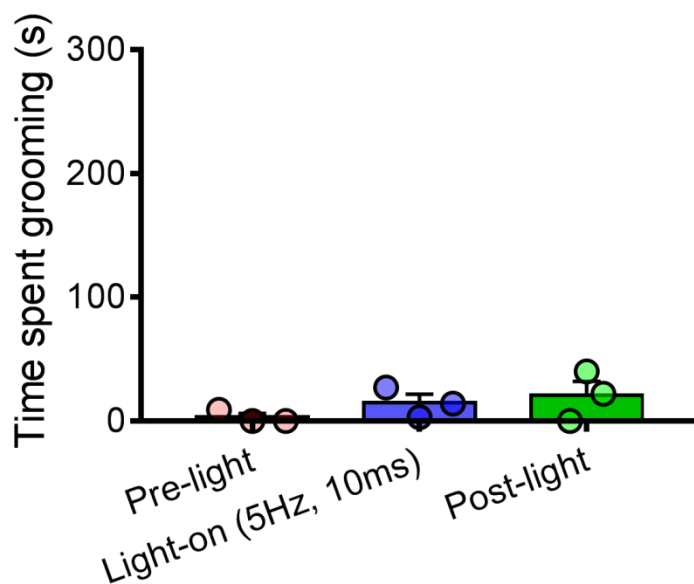

**Supplementary Figure 13** Photostimulation of PVH<sup>*Sim1-GFP*</sup> neurons does not increase grooming behavior. (a) Shows approximate optic fiber placements (green outlined boxes) and cre-dependent GFP injection sites (green X's) in *Sim1-Cre* mice used for behavioral experiments in (c). (b) Representative image of a *Sim1-Cre* mouse showing GFP expression in PVH and optic fiber placement above the same region. Scale bar = 300  $\mu$ m. (c) *In vivo* optical stimulation (5Hz, 10ms) of PVH<sup>*Sim1-GFP*</sup> neurons does not lead to increased grooming behavior compared to pre- and post-light epochs (repeated measures ANOVA; light epoch  $F(2, 4) = 2.329, P=0.2134$ ). Each epoch lasted 5 mins for a total of 15 consecutive minutes. Data are presented as  $\pm$ s.e.m.

## Rabies Injection site: PVH

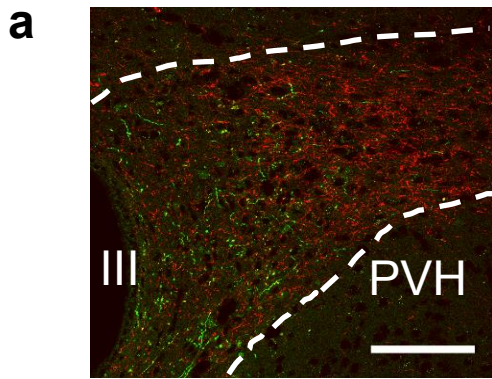

TVA-mCherry

Rabies-dG-  
EGFP (ENVA)

## Co-Labeled Rabies+TVA in LH

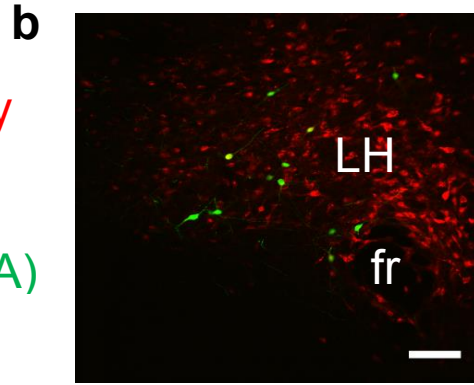

## Collateral projections

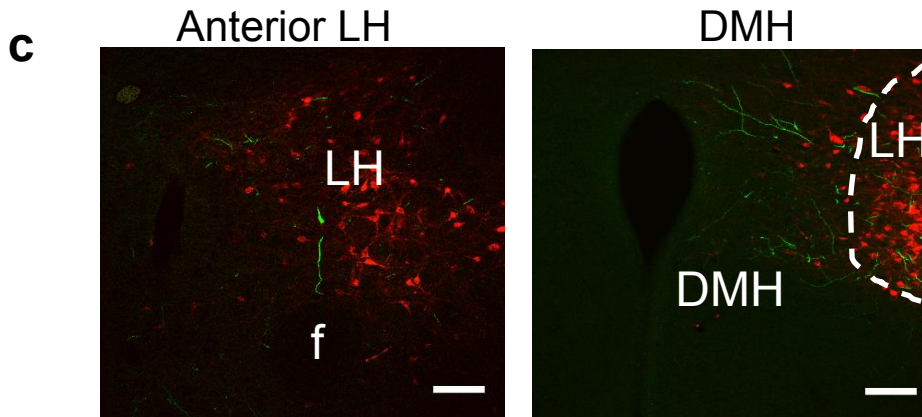

## 2 main projection sites: No Collaterals

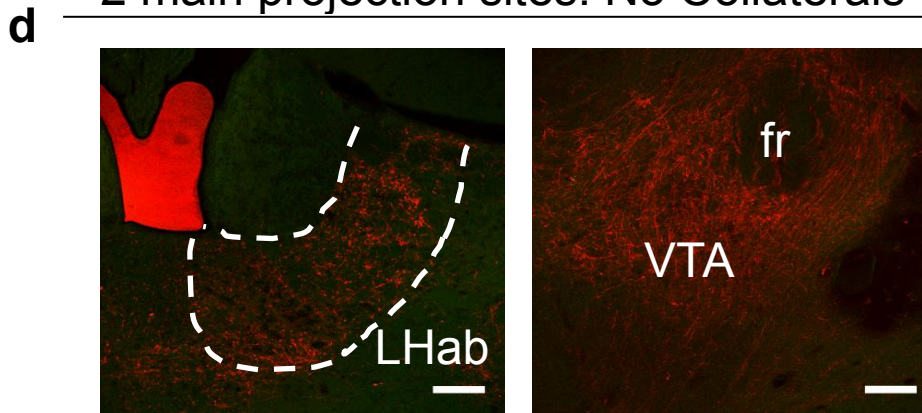

**Supplementary Figure 14** PVH projecting LH neurons do not send collaterals to lateral habenula or VTA. Using *Pdx1-Cre* mice, we performed rabies terminal mapping study to assess the degree of collateralization of LH→PVH to other structures. Using the same protocol as described in previous studies (Betley et. al. Cell 2013 and Garfield et. al. Nat. Neurosci. 2015), we first delivered AAV-FLEX-TVA-mCherry to the LH of *Pdx1-Cre* mice, and 4 weeks later, delivered pseudotyped rabies virus deltaG to the PVH. As shown in panels **a** and **d**, TVA-expressing fibers were found in all known LH projection sites including PVH, lateral habenula and VTA. Importantly, abundant GFP-expressing fibers were also found in the PVH (panel **a**), confirming successful delivery of rabies virus in the PVH. As expected, a subset of LH neurons expressed GFP (panel **b**). However, no apparent GFP-expressing fibers were found in either lateral habenula or VTA (panel **d**). Interestingly, rare GFP-expressing fibers were found in the DMH and LH (panel **c**). These results suggest that the PVH-projecting LH neurons send an insignificant amount of collaterals to other projection sites. fr: fornix; III: 3rd ventricle; PVH: paraventricular hypothalamus; LH: lateral hypothalamus; DMH: dorsomedial hypothalamus; Lhab: lateral habenula; VTA: ventral tegmental area.

**Supplementary Table 1** Mouse models used in Figures

| <b>Figure number</b> | <b>Genotypes used</b>                                          | <b>Number of mice used</b>                                                                                                        | <b>Virus used; Target region; Location of cells recorded or Optical Fiber placement OR experiment description</b>                      |
|----------------------|----------------------------------------------------------------|-----------------------------------------------------------------------------------------------------------------------------------|----------------------------------------------------------------------------------------------------------------------------------------|
| 1d and 1f            | <i>Pdx1-Cre</i>                                                | -For oEPSCs and oIPSCs: 9 Mice (120 cells);<br>-For oEPSCs+CNQX/APV: 5 mice (6 cells);<br>-For oIPSCs+GABAazine: 5 mice (9 cells) | AAV-FLEX-ChR2-EYFP; LH; PVH                                                                                                            |
| 1e                   | <i>Pdx1-Cre</i>                                                | -For oEPSCs+TTX/4-AP: 2 mice (8 cells);<br>-For oIPSCs+TTX/4-AP: 2 mice (8 cells)                                                 | AAV-FLEX-ChR2-EYFP; LH; PVH                                                                                                            |
| 2a-d                 | <i>Pdx1-Cre</i><br><i>Pdx1-Cre::Vgat<sup>flox/flox</sup></i>   | - <i>Pdx1-Cre</i> : 3 Mice<br>- <i>Pdx1-Cre::Vgat<sup>flox/flox</sup></i> : 4 mice                                                | AAV-FLEX-ChR2-EYFP; LH; PVH                                                                                                            |
| 2g-i                 | <i>Pdx1-Cre</i><br><i>Pdx1-Cre::Vgat<sup>flox/flox</sup></i>   | 7 mice total; Combined data from <i>Pdx1-Cre</i> (n=3) and <i>Pdx1-Cre::Vgat<sup>flox/flox</sup></i> (n=4) groups                 | AAV-FLEX-ChR2-EYFP; LH; PVH                                                                                                            |
| 3a-b                 | <i>Pdx1-Cre</i><br><i>Pdx1-Cre::Vglut2<sup>flox/flox</sup></i> | - <i>Pdx1-Cre</i> : 8 Mice<br>- <i>Pdx1-Cre::Vglut2<sup>flox/flox</sup></i> : 7 mice                                              | AAV-FLEX-ChR2-EYFP; LH; PVH                                                                                                            |
| 3c-e                 | <i>Pdx1-Cre</i><br><i>Pdx1-Cre::Vglut2<sup>flox/flox</sup></i> | - <i>Pdx1-Cre</i> (GFP control): 6 mice<br>- <i>Pdx1-Cre::Vglut2<sup>flox/flox</sup></i> : 4 mice                                 | - <i>Pdx1-Cre</i> (GFP control): AAV-FLEX-EGFP; LH; PVH<br>- <i>Pdx1-Cre::Vglut2<sup>flox/flox</sup></i> : AAV-FLEX-ChR2-EYFP; LH; PVH |
| 3g-h                 | <i>Pdx1-Cre</i><br><i>Pdx1-Cre::Vglut2<sup>flox/flox</sup></i> | - <i>Pdx1-Cre</i> : 4 mice<br>- <i>Pdx1-Cre::Vglut2<sup>flox/flox</sup></i> : 3 mice                                              | AAV-FLEX-ChR2-EYFP; LH; PVH                                                                                                            |
| 4a (included in 4c)  |                                                                | -For oEPSCs: 1 Mouse (12 cells)                                                                                                   | AAV-FLEX-ChR2-EYFP; LH; PVH                                                                                                            |

|                     |                                                                                              |                                                                                                                    |                                                                                                                          |
|---------------------|----------------------------------------------------------------------------------------------|--------------------------------------------------------------------------------------------------------------------|--------------------------------------------------------------------------------------------------------------------------|
|                     | <i>Pdx1-Cre::γ2<sup>flox/flox</sup></i>                                                      | -For oIPSCs: 1 Mouse<br>(12 cells)                                                                                 |                                                                                                                          |
| 4b (included in 4c) | <i>Pdx1-Cre::Sim1-Cre::γ2<sup>flox/flox</sup></i>                                            | -For oEPSCs: 1 Mouse<br>(12 cells)<br>-For oIPSCs: 1 Mouse<br>(12 cells)                                           | AAV-FLEX-ChR2-EYFP; LH; PVH                                                                                              |
| 4d                  | <i>Pdx1-Cre::γ2<sup>flox/flox</sup></i><br><i>Pdx1-Cre::Sim1-Cre::γ2<sup>flox/flox</sup></i> | - <i>Pdx1-Cre::γ2<sup>flox/flox</sup></i> : 7 mice<br>- <i>Pdx1-Cre::Sim1-Cre::γ2<sup>flox/flox</sup></i> : 6 mice | AAV-FLEX-ChR2-EYFP; LH; PVH                                                                                              |
| 4g                  | <i>Pdx1-Cre::Vgat<sup>flox/flox</sup></i>                                                    | 3 mice                                                                                                             | AAV-FLEX-ChR2-EYFP; LH; PVH                                                                                              |
| 5c-e                | <i>Pdx1-Cre::Vglut2<sup>flox/flox</sup></i>                                                  | 3 mice                                                                                                             | AAV-FLEX-eArchT3.0-EGFP; LH; PVH                                                                                         |
| 5g-i                | <i>Pdx1-Cre::Vgat<sup>flox/flox</sup></i>                                                    | 5 mice                                                                                                             | AAV-FLEX-eArchT3.0-EGFP; LH; PVH                                                                                         |
| 6b-c                | <i>Pdx1-Cre::Vgat<sup>flox/flox</sup></i>                                                    | 5 mice                                                                                                             | AAV-FLEX-ChR2-EYFP; LH; PVH                                                                                              |
| 6e                  | <i>Pdx1-Cre::Vglut2<sup>flox/flox</sup></i>                                                  | 3 mice                                                                                                             | AAV-FLEX-ChR2-EYFP; LH; PVH                                                                                              |
| 6f                  | <i>Pdx1-Cre::Vglut2<sup>flox/flox</sup></i>                                                  | 5 mice                                                                                                             | AAV-FLEX-ChR2-EYFP; LH; PVH                                                                                              |
| 7c-e                | <i>Sim1-Cre</i><br><i>Sim1-Cre::Vglut2<sup>flox/flox</sup></i>                               | - <i>Sim1-Cre</i> : 4 mice<br>- <i>Sim1-Cre::Vglut2<sup>flox/flox</sup></i> : 4 mice                               | AAV-FLEX-ChR2-EYFP; PVH; PVH                                                                                             |
| 7f                  | <i>Sim1-Cre</i>                                                                              | 1 mouse (5 cells)                                                                                                  | AAV-FLEX-iC++-EYFP; PVH; PVH                                                                                             |
| 7g-i                | <i>Sim1-Cre</i>                                                                              | - <i>Sim1-Cre</i> (GFP control): 4 mice<br>- <i>Sim1-Cre</i> (iC++ group): 6 mice                                  | - <i>Sim1-Cre</i> (GFP control): AAV-FLEX-EGFP; PVH; PVH<br>- <i>Sim1-Cre</i> (iC++ group): AAV-FLEX-iC++-EYFP; PVH; PVH |
| Suppl. Fig. 1a-h    | <i>Pdx1-Cre::Ai9</i>                                                                         | 1 representative mouse brain                                                                                       | N/A                                                                                                                      |
| Suppl. Fig. 1i-k    | wild-type                                                                                    | 1 representative mouse brain                                                                                       | <i>Vgat</i> and <i>Vglut2</i> <i>in situ</i> hybridization                                                               |
| Suppl. Fig. 3a-b    | <i>Pdx1-Cre::Vgat<sup>flox/flox</sup></i>                                                    | 3 mice (25 cells)                                                                                                  | AAV-FLEX-ChR2-EYFP; LH; PVH                                                                                              |



|                  |                                             |                                                                  |                                                        |
|------------------|---------------------------------------------|------------------------------------------------------------------|--------------------------------------------------------|
| Suppl. Fig. 3c-d | <i>Pdx1-Cre::Vglut2<sup>flox/flox</sup></i> | 1 mouse (12 cells)                                               | AAV-FLEX-ChR2-EYFP; LH; PVH                            |
| Suppl. Fig. 4e-h | <i>Pdx1-Cre</i>                             | 4 mice                                                           | AAV-FLEX-EGFP; LH; PVH                                 |
| Suppl. Fig. 6a   | <i>Vglut2<sup>flox/flox</sup></i>           | 1 representative mouse brain                                     | <i>Vglut2 in situ</i> hybridization                    |
| Suppl. Fig. 6b   | <i>Pdx1-Cre::Vglut2<sup>flox/flox</sup></i> | 1 representative mouse brain                                     | <i>Vglut2 in situ</i> hybridization                    |
| Suppl. Fig. 6c   | <i>Pdx1-Cre</i>                             | - <i>Pdx1-Cre</i> : 4 mice                                       | AAV-FLEX-ChR2-EYFP; LH; PVH                            |
|                  | <i>Pdx1-Cre::Vglut2<sup>flox/flox</sup></i> | - <i>Pdx1-Cre::Vglut2<sup>flox/flox</sup></i> : 3 mice           |                                                        |
| Suppl. Fig. 7a-b | <i>Sim1-Cre</i>                             | - <i>Sim1-Cre</i> : 17 cells from 2 mice                         | <i>Ex-vivo</i> Loose-patch recordings                  |
|                  | <i>Sim1-Cre::γ2<sup>flox/flox</sup></i>     | - <i>Sim1-Cre::γ2<sup>flox/flox</sup></i> : 18 cells from 2 mice |                                                        |
| Suppl. Fig. 9    | <i>Pdx1-Cre::Sim1-Cre::Ai9</i>              | 1 representative mouse brain                                     | AAV-FLEX-Synaptophysin-GFP; LH/for anterograde tracing |
| Suppl. Fig. 10b  | <i>Pdx1-Cre</i>                             | 3 mice (4 cells)                                                 | AAV-FLEX-ChR2-EYFP/AAV-FLEX-eArchT3.0-EGFP; LH; PVH    |
| Suppl. Fig. 10c  | <i>Pdx1-Cre::Vglut2<sup>flox/flox</sup></i> | 3 mice                                                           | AAV-FLEX-eArchT3.0-EGFP; LH; PVH                       |
| Suppl. Fig. 10e  | <i>Pdx1-Cre</i>                             | 1 mouse (2 cells)                                                | AAV-FLEX-ChR2-EYFP/AAV-FLEX-eArchT3.0-EGFP; LH; PVH    |
| Suppl. Fig. 11e  | <i>Pdx1-Cre::Vglut2<sup>flox/flox</sup></i> | 3 mice                                                           | AAV-FLEX-ChR2-EYFP; LH; PVH                            |
| Suppl. Fig. 12f  | <i>Sim1-Cre</i>                             | 1 mouse (3 cells)                                                | AAV-FLEX-ChR2-EYFP; PVH; PVH                           |
| Suppl. Fig. 13c  | <i>Sim1-Cre</i>                             | 3 mice                                                           | AAV-FLEX-EGFP; PVH; PVH                                |
